# Supplementary material for: Cellular density‐dependent increases in HIF‐1α compete with c‐Myc to down‐regulate human EP4 receptor promoter activity through Sp‐1‐binding region
Source: PubMed Central journal article supplement (PMC6230926; doi:10.1002/prp2.441), 2018-11-11

### Supporting information 1B

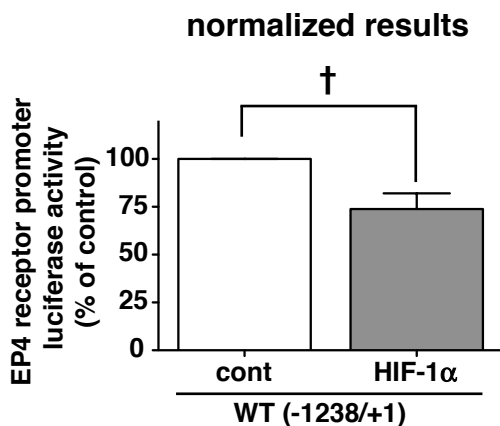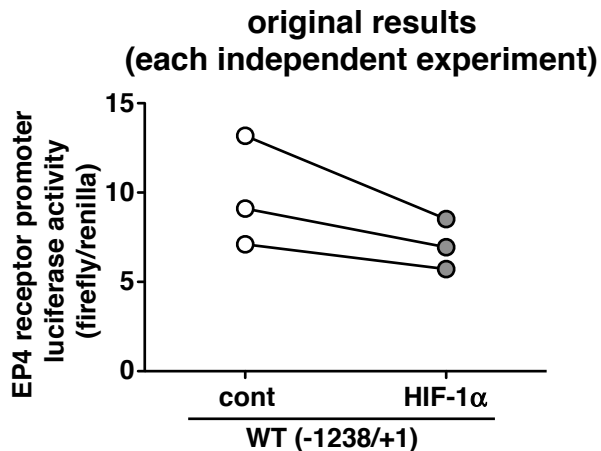

### Supporting information 1C

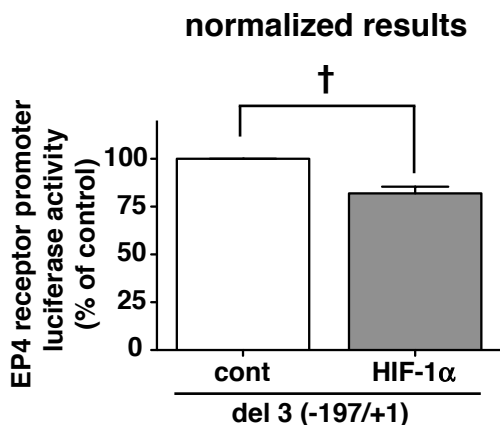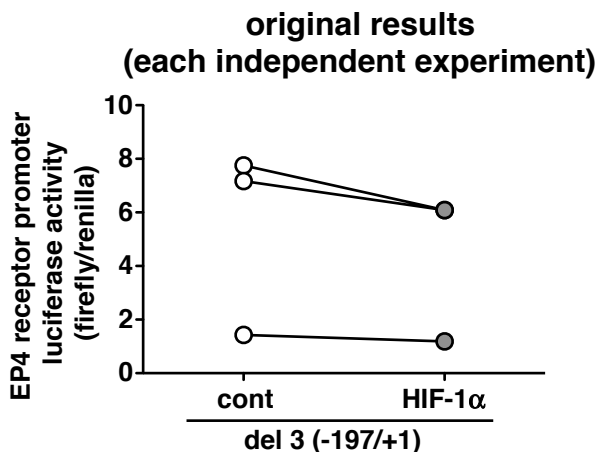

### Supporting information 1D

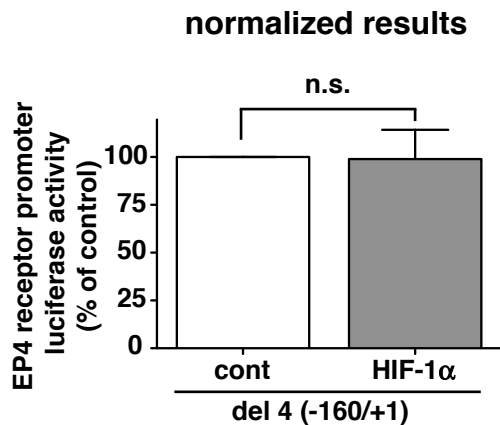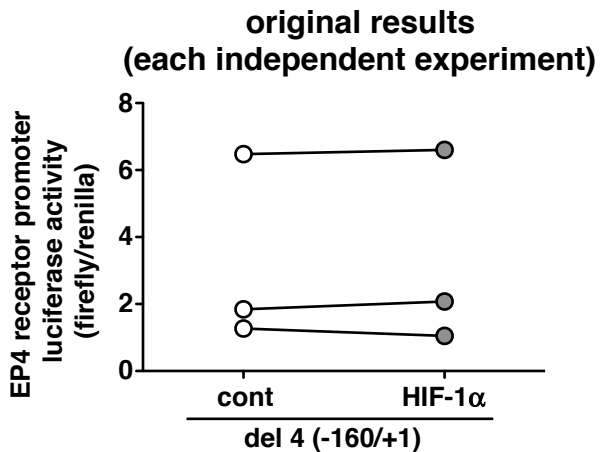

### Supporting information 3A (WT)

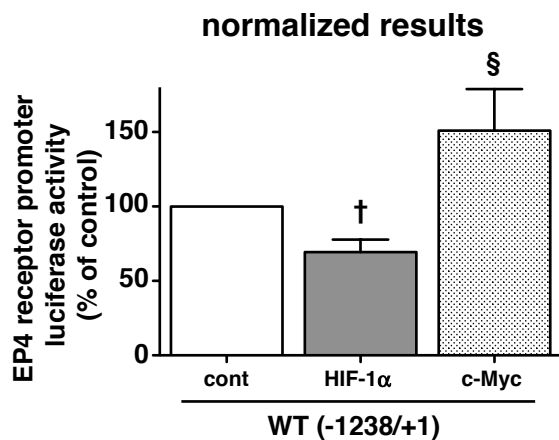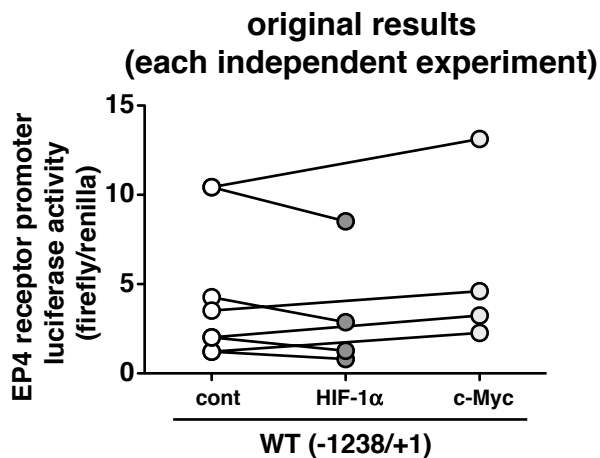

### Supporting information 3A (del 4)

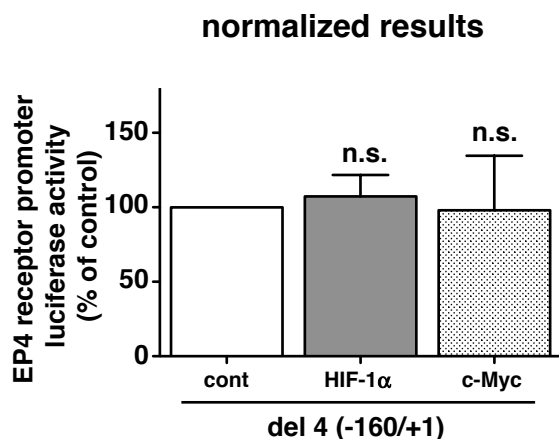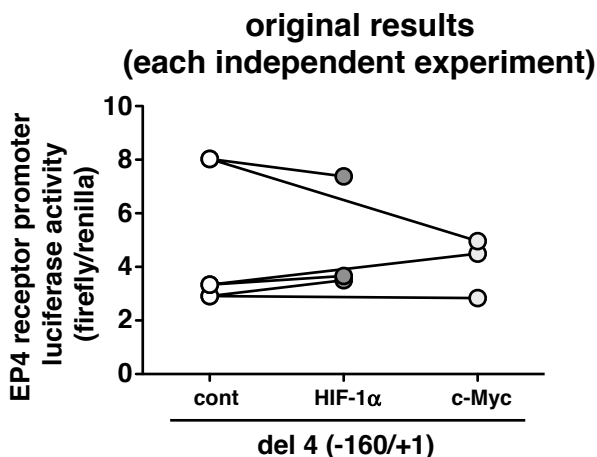

### Supporting information 3A (mut-A,B-del 3)

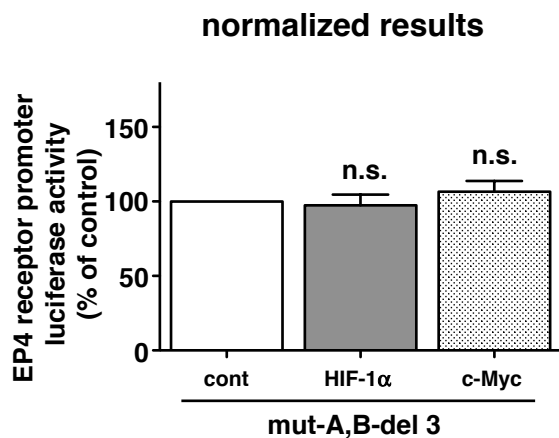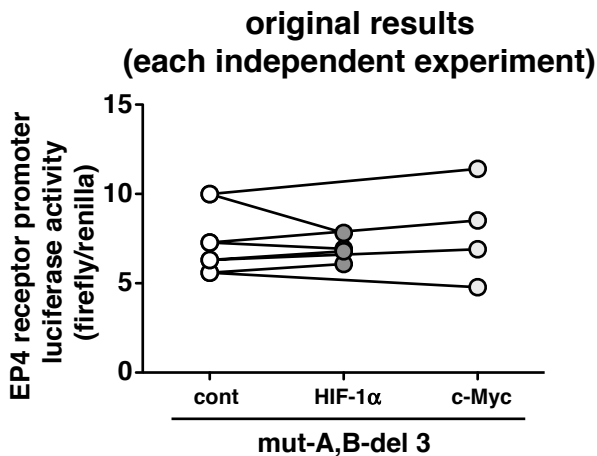

### Supporting information 3C

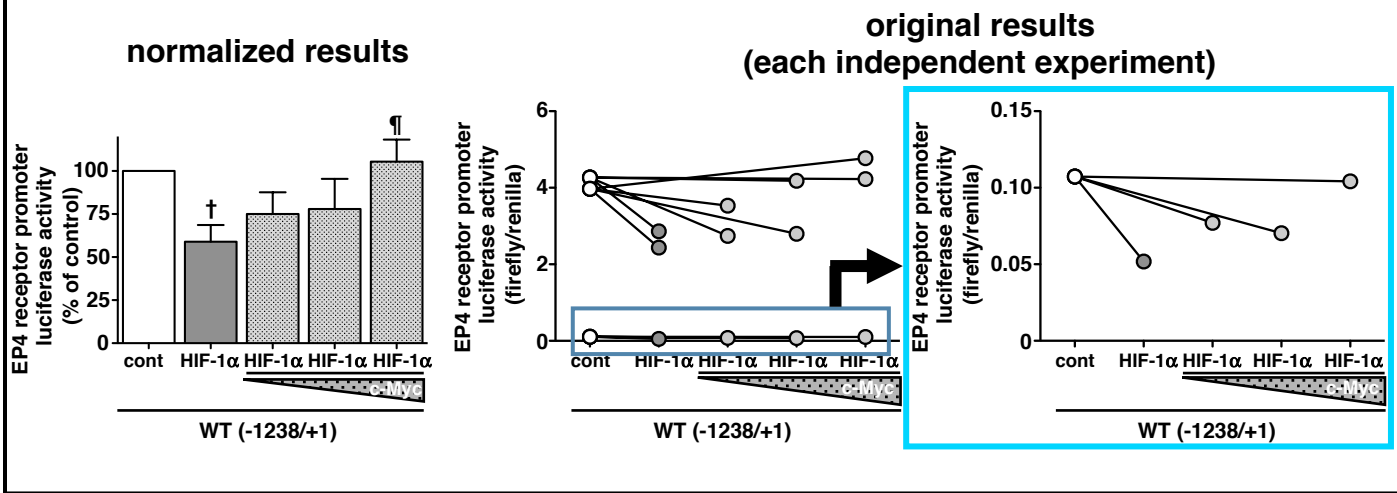

### Supporting information 3D

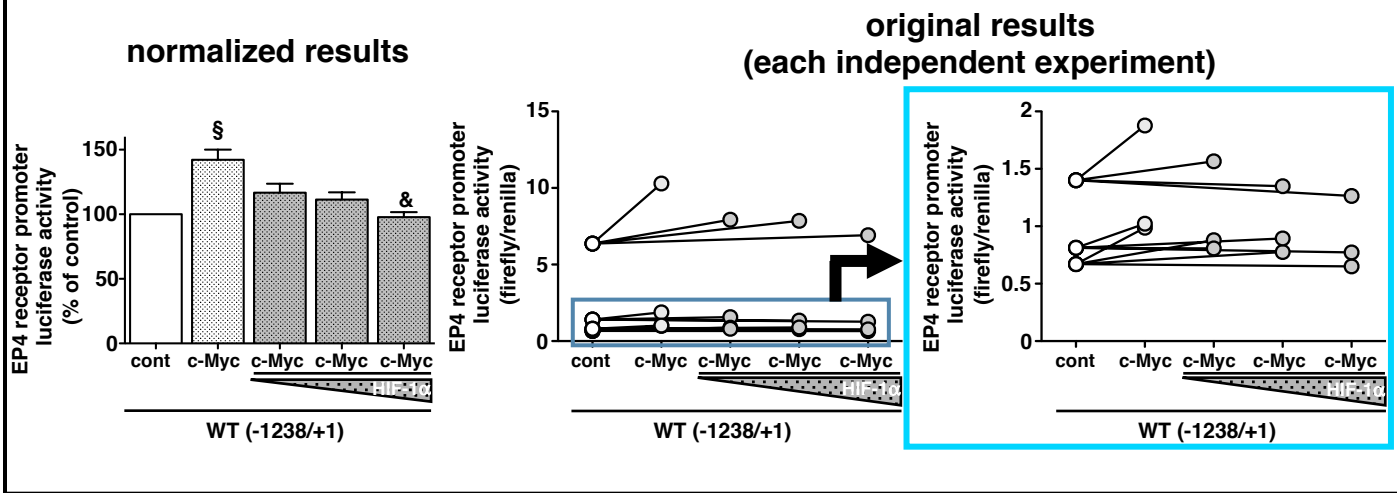

Supplement: PRP2-6-e00441-s001.pdf [file PRP2-6-e00441-s001.pdf]
